# Supplementary material
Source: PubMed Central journal article supplement (PMC4302010)
Supplement: NIHMS635220-supplement-1.pdf [file NIHMS635220-supplement-1.pdf]

**Supplementary File 1. List of AR of co-expressed genes. Each gene has an absolute Pearson's correlation coefficient (|CC|) of > 0.5 with AR expression (p< 0.001)**

| Gene       | CC    | Gene    | CC     |
|------------|-------|---------|--------|
| AR         | 1     | PRNP    | -0.75  |
| F7         | 0.716 | DONSON  | -0.681 |
| PATZ1      | 0.709 | TTK     | -0.662 |
| ZNF205-AS1 | 0.699 | EHBP1   | -0.654 |
| NFATC4     | 0.681 | PICALM  | -0.649 |
| SPDEF      | 0.67  | NAB1    | -0.644 |
| MXD4       | 0.661 | USP1    | -0.642 |
| CTNND2     | 0.651 | GALNT2  | -0.63  |
| SLCO2A1    | 0.645 | PGM1    | -0.628 |
| RHOH       | 0.643 | GLS     | -0.613 |
| SGSM3      | 0.638 | STIL    | -0.612 |
| TP53TG1    | 0.636 | TOP2A   | -0.612 |
| FGFR4      | 0.634 | BUB1    | -0.609 |
| PYGO1      | 0.633 | GART    | -0.609 |
| MGAT5      | 0.632 | SNRPD1  | -0.596 |
| PCDHA5     | 0.621 | BTG3    | -0.595 |
| DALRD3     | 0.616 | CRLF3   | -0.594 |
| SLC9A1     | 0.614 | MSN     | -0.594 |
| IGHM       | 0.612 | XPO1    | -0.594 |
| AMBP       | 0.603 | ATR     | -0.593 |
| CRAT       | 0.601 | CCT8    | -0.592 |
| MVK        | 0.601 | IPO5    | -0.589 |
| ZNF552     | 0.597 | CHST6   | -0.585 |
| FZD4       | 0.592 | DLGAP5  | -0.584 |
| INPP5J     | 0.592 | TRMT11  | -0.58  |
| ADCY2      | 0.591 | IARS    | -0.577 |
| PIP        | 0.59  | PRPS2   | -0.573 |
| SLC1A4     | 0.588 | CDC27   | -0.571 |
| RHOB       | 0.587 | BIRC2   | -0.568 |
| ADCY10     | 0.587 | IL27    | -0.566 |
| FRAT1      | 0.582 | PMAIP1  | -0.565 |
| SLC29A3    | 0.581 | PMS1    | -0.565 |
| MMP26      | 0.581 | SMC4    | -0.564 |
| AQP6       | 0.58  | SLC9A6  | -0.562 |
| VRK3       | 0.58  | UPF3A   | -0.562 |
| PRDM5      | 0.58  | BICD2   | -0.56  |
| RNF103     | 0.58  | IKBKAP  | -0.559 |
| IGLJ3      | 0.576 | ZCCHC11 | -0.558 |
| FOXA1      | 0.574 | RCN2    | -0.556 |
| CD84       | 0.573 | CHRNA5  | -0.555 |
| CRP        | 0.572 | SOD2    | -0.555 |
| IGF1       | 0.572 | HNRNPH3 | -0.554 |
| ALAD       | 0.571 | NDC80   | -0.55  |

|         |       |          |        |
|---------|-------|----------|--------|
| OSGIN2  | 0.571 | LRRC40   | -0.547 |
| CACFD1  | 0.57  | HNRNPH1  | -0.547 |
| ABHD11  | 0.57  | SPATS2L  | -0.546 |
| CYB561  | 0.569 | ZZZ3     | -0.544 |
| AKT1    | 0.568 | NMI      | -0.544 |
| BCAN    | 0.568 | TBC1D1   | -0.544 |
| GGTLC1  | 0.568 | CDC20    | -0.542 |
| MEGF9   | 0.567 | PLS3     | -0.54  |
| GH1     | 0.566 | NCOA4    | -0.539 |
| EPB41L4 | 0.565 | CKS2     | -0.538 |
| SEMA3F  | 0.565 | DARS     | -0.538 |
| CLDN5   | 0.564 | MBNL1    | -0.538 |
| FLT3    | 0.563 | USP16    | -0.537 |
| NOL12   | 0.563 | MTMR2    | -0.535 |
| DCXR    | 0.562 | PRKD3    | -0.534 |
| NAT2    | 0.562 | CEP57    | -0.533 |
| KLRG1   | 0.56  | SRPK1    | -0.533 |
| PCDHA12 | 0.56  | CUL5     | -0.532 |
| ZNF444  | 0.559 | DEK      | -0.532 |
| IGFBP5  | 0.559 | SERBP1   | -0.531 |
| CASS4   | 0.558 | HMMR     | -0.53  |
| CETN1   | 0.558 | HIF1A    | -0.529 |
| DNMT3A  | 0.558 | PLSCR1   | -0.529 |
| TREML2  | 0.558 | CEBPD    | -0.528 |
| MTMR3   | 0.558 | YBX3     | -0.525 |
| SLC5A5  | 0.558 | ACYP1    | -0.524 |
| NME3    | 0.557 | CDC42EP3 | -0.524 |
| ALDH4A1 | 0.556 | TAF1D    | -0.52  |
| MT1G    | 0.556 | SF3A3    | -0.52  |
| NARFL   | 0.555 | FXD5     | -0.519 |
| CAMK2A  | 0.553 | PTS      | -0.519 |
| GATA3   | 0.553 | UBA2     | -0.519 |
| IDS     | 0.553 | CD58     | -0.518 |
| ITGA2B  | 0.553 | CDC5L    | -0.518 |
| MAPK3   | 0.553 | COL18A1  | -0.517 |
| APOA1   | 0.551 | CAV2     | -0.516 |
| CHN2    | 0.549 | TEX10    | -0.516 |
| GRM4    | 0.549 | QTRTD1   | -0.513 |
| GUCY2D  | 0.549 | AMD1     | -0.511 |
| GRID2   | 0.548 | ANP32E   | -0.511 |
| RABEP2  | 0.547 | RHBDL2   | -0.509 |
| SLC44A4 | 0.545 | MRPL39   | -0.509 |
| CAB39L  | 0.545 | DDX18    | -0.508 |
| GSR     | 0.545 | E2F3     | -0.508 |
| SEPP1   | 0.545 | GPATCH8  | -0.507 |
| DNASE2B | 0.544 | IL27RA   | -0.507 |
| ZNF835  | 0.544 | NUP160   | -0.506 |

|         |       |         |        |
|---------|-------|---------|--------|
| KCNMA1  | 0.544 | ZNF207  | -0.506 |
| POLL    | 0.542 | FBXO5   | -0.504 |
| ITSN2   | 0.541 | NCK1    | -0.504 |
| CCL13   | 0.541 | EXOSC9  | -0.504 |
| TACR2   | 0.541 | SRSF11  | -0.504 |
| MGAT4C  | 0.54  | SMS     | -0.504 |
| CACNG4  | 0.539 | SPTLC1  | -0.504 |
| AVIL    | 0.538 | TOPBP1  | -0.503 |
| KCNK13  | 0.538 | ARCN1   | -0.502 |
| MAPK4   | 0.538 | CBR1    | -0.502 |
| TSPAN1  | 0.538 | HJURP   | -0.502 |
| CHIA    | 0.537 | TCP1    | -0.502 |
| CAPN9   | 0.536 | LYN     | -0.501 |
| CHRNA2  | 0.536 | ANAPC1  | -0.501 |
| AKAP7   | 0.535 | OSBPL11 | -0.501 |
| CHN2    | 0.535 |         |        |
| LDLRAP1 | 0.533 |         |        |
| CLN3    | 0.531 |         |        |
| PRB1    | 0.531 |         |        |
| TM9SF1  | 0.53  |         |        |
| RHBDD3  | 0.529 |         |        |
| CDSN    | 0.529 |         |        |
| KAZALD1 | 0.529 |         |        |
| TREM2   | 0.529 |         |        |
| PARM1   | 0.527 |         |        |
| ARL15   | 0.526 |         |        |
| GGT2    | 0.526 |         |        |
| ZZEF1   | 0.526 |         |        |
| SCN2B   | 0.526 |         |        |
| PDE11A  | 0.525 |         |        |
| SIGLEC5 | 0.525 |         |        |
| SLC11A2 | 0.525 |         |        |
| PLEKHG3 | 0.524 |         |        |
| TM7SF2  | 0.524 |         |        |
| AMHR2   | 0.523 |         |        |
| CA12    | 0.523 |         |        |
| UGT2A3  | 0.523 |         |        |
| KAT6B   | 0.523 |         |        |
| AMELY   | 0.522 |         |        |
| PRKRIR  | 0.522 |         |        |
| ATP2A3  | 0.521 |         |        |
| TBC1D9  | 0.52  |         |        |
| PGLYRP1 | 0.52  |         |        |
| PLCH1   | 0.519 |         |        |
| CD80    | 0.518 |         |        |
| KLK13   | 0.518 |         |        |
| PCDHA9  | 0.518 |         |        |

|            |       |
|------------|-------|
| TSSK2      | 0.517 |
| ATP6IP1    | 0.516 |
| FAM162A    | 0.516 |
| NCR1       | 0.516 |
| ST6GALNAC2 | 0.516 |
| XBP1       | 0.516 |
| CEND1      | 0.515 |
| LDB3       | 0.515 |
| IFT27      | 0.515 |
| WAS        | 0.515 |
| IRX5       | 0.514 |
| PVRL1      | 0.514 |
| CEACAM3    | 0.514 |
| CDY1       | 0.513 |
| DTNA       | 0.513 |
| PSG3       | 0.513 |
| TGFB3      | 0.513 |
| DLG3       | 0.512 |
| MC2R       | 0.511 |
| OR1D2      | 0.511 |
| DNAI1      | 0.51  |
| MAG        | 0.51  |
| OR10C1     | 0.51  |
| PIGR       | 0.51  |
| SPAG8      | 0.51  |
| ARHGEF16   | 0.509 |
| PHF20      | 0.509 |
| GJC2       | 0.509 |
| ZNF507     | 0.509 |
| NUDT4      | 0.509 |
| FAM46C     | 0.508 |
| NCR2       | 0.508 |
| PNPLA2     | 0.508 |
| CALCRL     | 0.507 |
| EGLN3      | 0.507 |
| HIST1H1D   | 0.507 |
| SPATA7     | 0.506 |
| KXD1       | 0.506 |
| CCNG2      | 0.505 |
| CRIP2      | 0.505 |
| WDTC1      | 0.505 |
| LDB1       | 0.505 |
| PDK2       | 0.505 |
| PNLIP      | 0.505 |
| TSPAN31    | 0.505 |
| SCTR       | 0.505 |
| SELENBP1   | 0.505 |

|         |       |
|---------|-------|
| VPREB3  | 0.505 |
| AGR2    | 0.504 |
| SMPDL3A | 0.504 |
| CEBPE   | 0.504 |
| CD19    | 0.502 |
| DNAH6   | 0.502 |
| CXCL6   | 0.502 |
| IL21    | 0.502 |
| ODF1    | 0.502 |
| AP1G1   | 0.501 |
| TET3    | 0.501 |
