# Supplementary material
Source: PubMed Central journal article supplement (PMC4302010)
Supplement: NIHMS635220-supplement-2.pdf [file NIHMS635220-supplement-2.pdf]

**Supplementary File 2. Functional Annotation of AR co-expressed genes. Gene Ontology groups with p< 0.01 are listed.**

| Gene Ontology Term                                  | Count | %        | PValue   | Genes                                                                                                                                                                                                                                                                                                      | List Total | Pop Hits | Pop Total | Fold Enrichment |
|-----------------------------------------------------|-------|----------|----------|------------------------------------------------------------------------------------------------------------------------------------------------------------------------------------------------------------------------------------------------------------------------------------------------------------|------------|----------|-----------|-----------------|
| cell cycle                                          | 18    | 6.185567 | 6.42E-04 | ANAPC1, E2F3, DLGAP5, NDC80, CDC20, CETN1, CDC5L, CCNG2, SMC4, RNF103, SGSM3, HJURP, MAPK4, MAPK3, CKS2, BUB1, FBXO5, USP16                                                                                                                                                                                | 290        | 461      | 19235     | 2.589797292     |
| glucose metabolism                                  | 4     | 1.37457  | 0.001081 | AKT1, PDK2, PGM1, DCXR                                                                                                                                                                                                                                                                                     | 290        | 14       | 19235     | 18.95073892     |
| oxygen homeostasis                                  | 3     | 1.030928 | 0.003184 | HIF1A, NARFL, SOD2                                                                                                                                                                                                                                                                                         | 258        | 5        | 14116     | 32.82790698     |
| regulation of mitosis                               | 6     | 2.061856 | 0.003391 | CAV2, DLGAP5, BUB1, IGF1, TTK, ZZEF1                                                                                                                                                                                                                                                                       | 240        | 56       | 13174     | 5.88125         |
| positive regulation of protein metabolic process    | 12    | 4.123711 | 0.004857 | ANAPC1, AKT1, GH1, CD80, LYN, SGSM3, TGF83, IGF1, TTK, FBXO5, CDC20, CDC27                                                                                                                                                                                                                                 | 240        | 243      | 13174     | 2.710699588     |
| macromolecular complex assembly                     | 23    | 7.90378  | 0.005062 | XPO1, IKBKAP, CAV2, E2F3, TCP1, HIST1H1D, DARS, SNRPD1, MBNL1, WAS, BIRC2, SOD2, SF3A3, MTMR2, APOA1, PICALM, HJURP, NCK1, IPO5, FBXO5, USP16, PRNP, MYST4                                                                                                                                                 | 258        | 665      | 14116     | 1.89233549      |
| regulation of T-helper 1 type immune response       | 3     | 1.030928 | 0.006528 | IL27RA, CD80, IL27                                                                                                                                                                                                                                                                                         | 258        | 7        | 14116     | 23.44850498     |
| nucleoside monophosphate metabolic process          | 6     | 2.061856 | 0.006969 | ADCY2, NUDT4, ADCY10, PRPS2, GART, GUCY2D                                                                                                                                                                                                                                                                  | 258        | 66       | 14116     | 4.9739253       |
| regulation of mitotic metaphase/anaphase transition | 4     | 1.37457  | 0.007111 | DLGAP5, BUB1, TTK, ZZEF1                                                                                                                                                                                                                                                                                   | 258        | 22       | 14116     | 9.947850599     |
| regulation of catabolic process                     | 7     | 2.405498 | 0.00799  | AKT1, CLN3, XPO1, HIF1A, SGSM3, IGF1, PNPLA2                                                                                                                                                                                                                                                               | 240        | 96       | 13174     | 4.002517361     |
| response to stress                                  | 45    | 15.46392 | 0.008504 | TP53TG1, NMI, IL27RA, CRP, EGLN3, PGLYRP1, TGFB3, CETN1, CXCL6, SLC11A2, AKT1, CUL5, GATA3, AVIL, NFATC4, SEPP1, TOP2A, PMS1, POLL, KCNMA1, COL18A1, CLN3, LYN, CEBPE, USP1, IL27, PSG3, IGF1, TOPBP1, F7, ATR, NCR2, NCR1, BIRC2, WAS, SOD2, CD84, PLSCR1, CCL13, HIF1A, CD19, KLRG1, NARFL, PRNP, PRKRIR | 258        | 1685     | 14116     | 1.461182803     |
| organelle fission                                   | 11    | 3.780069 | 0.009307 | ANAPC1, DLGAP5, BUB1, FBXO5, CETN1, CDC20, NDC80, USP16, CCNG2, CDC27, SMC4                                                                                                                                                                                                                                | 258        | 229      | 14116     | 2.628143936     |
| regulation of cellular component organization       | 17    | 5.841924 | 0.009831 | MAG, CAV2, XPO1, DLGAP5, TGFB3, IGF1, TTK, LDLRAP1, ZZEF1, AKT1, APOA1, PVRL1, NCK1, SEMA3F, AVIL, BUB1, CDC42EP3                                                                                                                                                                                          | 258        | 458      | 14116     | 2.030838496     |
