# Supplementary material
Source: PubMed Central journal article supplement (PMC4302010)
Supplement: NIHMS635220-supplement-3.pdf [file NIHMS635220-supplement-3.pdf]

Supplementary File 3. Proximity Matrix for AR gene-signature. Each gene has an absolute Pearson correlation coefficient (|CC|) of &gt; 0.6 with AR expression (p&lt;0.001)

| Genes      | AR    | AMB   | RHOH  | BUB1  | CRAT  | CTNND2 | SGSM3 | DONSON | F7    | FGFR4 | DALRD3 | GALNT2 | GART  | GLS   | IGHM  | EHBP1 | MXD4  | MGAT5 | ZNF205-AS1 | MVK   | NAB1  | NFATC4 | PCDH4 | SPDEF | PGM1  | PCALM | PRNP  | PYGO1 | STIL  | SLC22A1 | SLC9A1 | TOP2A | TP53TG1 | TTK   | USP1  | PATZ1 |       |
|------------|-------|-------|-------|-------|-------|--------|-------|--------|-------|-------|--------|--------|-------|-------|-------|-------|-------|-------|------------|-------|-------|--------|-------|-------|-------|-------|-------|-------|-------|---------|--------|-------|---------|-------|-------|-------|-------|
| AR         | 1.000 | .603  | .643  | -.609 | .601  | .651   | .638  | -.681  | .716  | .634  | .616   | -.630  | -.609 | -.613 | .612  | -.654 | .661  | .632  | .699       | .601  | -.644 | .681   | .621  | .670  | -.628 | -.649 | -.750 | .633  | -.612 | .645    | .614   | -.612 | .636    | -.662 | -.642 | -.709 |       |
| AMB        | .603  | 1.000 | .417  | -.440 | .334  | .397   | .531  | -.441  | .396  | .246  | .230   | -.531  | -.332 | -.328 | .534  | -.505 | .381  | .646  | .523       | .328  | -.442 | .402   | .507  | .398  | -.464 | -.430 | -.372 | .465  | -.376 | .452    | .458   | -.330 | .406    | -.459 | -.507 | .274  |       |
| RHOH       | .643  | .417  | 1.000 | -.827 | .461  | .481   | .557  | -.637  | .604  | .521  | .610   | -.495  | -.724 | -.760 | .278  | -.554 | .431  | .379  | .451       | .525  | -.486 | .502   | .386  | .809  | -.588 | -.478 | -.587 | .380  | -.673 | .471    | .548   | -.442 | .616    | -.622 | -.564 | .557  |       |
| BUB1       | -.609 | -.440 | -.827 | 1.000 | -.346 | -.484  | -.580 | .544   | -.486 | -.462 | -.571  | .503   | .672  | .727  | -.346 | .585  | -.430 | -.429 | -.507      | -.590 | .502  | -.431  | -.268 | -.785 | .573  | .413  | .497  | -.392 | .749  | -.556   | -.639  | .498  | -.702   | .747  | .653  | -.487 |       |
| CRAT       | .601  | .334  | .461  | -.346 | 1.000 | .379   | .582  | -.354  | .433  | .328  | .493   | -.398  | -.363 | -.486 | .470  | -.535 | .351  | .466  | .476       | .356  | -.521 | .526   | .357  | .473  | -.120 | -.464 | -.434 | .350  | -.374 | .509    | .299   | -.300 | .347    | -.356 | -.352 | .586  |       |
| CTNND2     | .651  | .397  | .481  | -.484 | .379  | 1.000  | .464  | -.537  | .592  | .423  | .416   | -.707  | -.621 | -.637 | -.572 | .402  | -.556 | .533  | .371       | .552  | .386  | -.520  | -.547 | .367  | .590  | -.385 | -.541 | -.598 | .380  | -.468   | .268   | .433  | -.313   | .485  | -.517 | -.508 | .387  |
| SGSM3      | .638  | .531  | .557  | -.580 | .582  | .464   | 1.000 | -.510  | .508  | .538  | .406   | -.508  | -.480 | -.569 | .477  | -.690 | .484  | .555  | .501       | .519  | -.460 | .518   | .309  | .608  | -.398 | -.524 | -.426 | .312  | -.509 | .516    | .505   | -.474 | .467    | -.480 | -.534 | .563  |       |
| DONSON     | -.681 | -.441 | -.637 | .544  | -.354 | -.537  | -.510 | 1.000  | -.642 | -.558 | -.472  | .491   | .729  | .556  | -.260 | .640  | -.601 | -.414 | -.570      | -.473 | .464  | -.477  | -.419 | -.631 | .595  | .670  | .586  | -.509 | .579  | -.347   | -.344  | .438  | -.607   | .529  | .627  | -.507 |       |
| F7         | .716  | .396  | .604  | -.486 | .433  | .592   | .508  | -.642  | 1.000 | .653  | .455   | -.517  | -.546 | -.586 | .440  | -.639 | .574  | .504  | .539       | .521  | -.419 | .373   | .498  | .624  | -.611 | -.619 | -.688 | .455  | -.503 | .395    | .409   | -.444 | .511    | -.535 | -.615 | .518  |       |
| FGFR4      | .634  | .246  | .521  | -.462 | .328  | .423   | .538  | -.558  | .653  | 1.000 | .502   | -.294  | -.450 | -.616 | .272  | -.471 | .550  | .303  | .384       | .461  | -.477 | .281   | .276  | .644  | -.458 | -.484 | -.635 | .204  | -.418 | .347    | .321   | -.438 | .570    | -.352 | -.494 | .461  |       |
| DALRD3     | .616  | .230  | .610  | -.571 | -.493 | .416   | -.406 | -.472  | .455  | .502  | 1.000  | -.374  | -.539 | -.613 | .379  | -.368 | .509  | .425  | .452       | .510  | -.552 | .406   | .416  | .596  | -.462 | -.582 | -.634 | .310  | -.532 | .544    | .295   | -.439 | .580    | -.536 | -.483 | .474  |       |
| GALNT2     | -.630 | -.531 | -.495 | .503  | -.398 | -.707  | -.508 | .491   | -.517 | -.294 | -.374  | 1.000  | .577  | .574  | -.559 | -.566 | -.410 | -.482 | -.660      | -.477 | .485  | -.347  | -.301 | -.608 | .390  | .569  | .592  | -.449 | .367  | -.352   | -.341  | .233  | -.467   | .620  | .442  | -.475 |       |
| GART       | -.609 | -.332 | -.724 | .672  | -.363 | -.621  | -.480 | .729   | -.546 | -.450 | -.539  | .577   | 1.000 | .719  | -.305 | .648  | -.429 | -.411 | -.556      | -.506 | .516  | -.329  | -.244 | -.738 | .548  | .660  | .629  | -.435 | .645  | -.358   | -.408  | .288  | -.642   | .570  | .655  | -.512 |       |
| GLS        | -.613 | -.328 | -.760 | .727  | -.486 | -.572  | -.569 | .556   | -.586 | -.616 | -.613  | .574   | .719  | 1.000 | -.329 | .692  | -.440 | -.415 | -.595      | -.549 | .617  | -.363  | -.275 | -.827 | .463  | .560  | .681  | -.277 | .573  | -.379   | -.489  | .279  | -.684   | .592  | .562  | -.625 |       |
| IGHM       | .612  | .534  | .278  | -.346 | .402  | .402   | .477  | -.260  | .440  | .272  | .379   | -.559  | -.305 | -.329 | 1.000 | -.518 | .381  | .687  | .561       | .348  | -.436 | .467   | .489  | .392  | -.382 | -.532 | -.382 | .646  | -.474 | .517    | .258   | -.306 | .373    | -.521 | -.580 | .352  |       |
| EHBP1      | -.654 | -.505 | -.554 | .585  | -.535 | -.596  | -.690 | .640   | -.639 | -.471 | -.368  | -.566  | .648  | .692  | -.518 | 1.000 | -.503 | -.641 | -.638      | -.585 | .449  | -.500  | -.432 | -.636 | .667  | .560  | .603  | -.462 | -.466 | .355    | -.539  | .586  | .625    | -.566 | -.566 |       |       |
| MXD4       | .661  | .381  | .431  | -.430 | .351  | .533   | .484  | -.601  | .574  | .550  | .509   | -.410  | -.429 | -.440 | .381  | -.503 | 1.000 | .379  | .390       | .482  | -.535 | .475   | .381  | .500  | -.518 | -.616 | -.575 | .271  | -.426 | .389    | .235   | -.327 | .434    | -.445 | -.519 | .450  |       |
| MGAT5      | .632  | .646  | .379  | -.429 | .466  | .371   | .555  | -.414  | .504  | .303  | .425   | -.482  | -.411 | -.415 | .687  | -.641 | .379  | 1.000 | .619       | .435  | -.618 | .508   | .510  | .457  | -.463 | -.684 | -.466 | .641  | -.497 | .590    | .408   | -.369 | .375    | -.559 | -.628 | .497  |       |
| ZNF205-AS1 | .699  | .523  | .451  | -.507 | .476  | .552   | .501  | -.570  | .539  | .384  | .452   | -.660  | -.556 | -.595 | .561  | -.638 | .390  | .619  | 1.000      | .342  | -.518 | .512   | .520  | .467  | -.444 | -.521 | -.564 | .592  | -.524 | .455    | .444   | -.285 | .555    | -.631 | -.542 | .487  |       |
| MVK        | .601  | .328  | .525  | -.590 | .356  | .366   | .519  | -.473  | .521  | .461  | .510   | -.477  | -.506 | -.549 | .348  | -.585 | .482  | .435  | .342       | 1.000 | -.424 | .204   | .107  | .613  | -.485 | -.565 | .293  | -.348 | -.411 | .466    | -.436  | .620  | -.487   | -.455 | .559  |       |       |
| NAB1       | -.644 | -.442 | -.486 | .502  | -.521 | -.520  | -.460 | .464   | -.419 | -.477 | -.552  | .485   | .516  | .617  | -.436 | .449  | -.535 | -.618 | -.518      | 1.000 | -.424 | 1.000  | -.432 | -.497 | -.628 | .389  | .575  | .565  | -.402 | .425    | -.463  | -.372 | .297    | -.414 | .541  | .527  | -.595 |
| NFATC4     | .681  | .402  | .502  | -.431 | .526  | .347   | .518  | -.477  | .373  | .281  | .406   | -.347  | -.329 | -.363 | .467  | -.500 | .475  | .508  | .512       | .204  | 1.000 | -.432  | .642  | .401  | -.411 | -.471 | -.361 | .575  | -.617 | .644    | .469   | -.432 | .277    | -.544 | -.477 | .627  |       |
| PCDH4      | .621  | .507  | .386  | -.268 | .357  | .367   | .309  | -.419  | .498  | .276  | .416   | -.301  | -.244 | -.275 | .489  | -.323 | .381  | .510  | .520       | .107  | 1.000 | -.497  | .642  | .307  | -.523 | -.349 | -.443 | .562  | -.527 | .511    | .398   | -.404 | .273    | -.545 | -.538 | .456  |       |
| SPDEF      | .670  | .398  | .809  | -.785 | .473  | .590   | .608  | -.631  | .624  | .644  | .596   | -.608  | -.738 | -.827 | .392  | -.636 | .500  | .457  | .467       | .613  | 1.000 | -.628  | .401  | .307  | 1.000 | -.554 | -.582 | -.710 | .383  | -.652   | .421   | .462  | -.383   | .712  | -.628 | -.669 | .631  |
| PGM1       | -.628 | -.464 | -.588 | .573  | -.120 | -.385  | -.398 | .595   | -.611 | -.468 | -.492  | .390   | .548  | .463  | -.383 | .522  | -.518 | -.463 | -.444      | -.573 | .389  | 1.000  | -.554 | .536  | .617  | -.458 | .567  | -.373 | -.478 | .466    | -.522  | .646  | .613    | -.407 | -.407 |       |       |
| PCALM      | -.649 | -.430 | -.478 | .413  | -.464 | -.541  | -.524 | .670   | -.619 | -.484 | -.582  | .569   | .660  | .560  | -.532 | -.562 | -.616 | -.684 | -.521      | -.485 | .575  | 1.000  | -.582 | .536  | 1.000 | .685  | -.514 | .513  | -.413 | -.185   | .209   | -.461 | .509    | .594  | -.549 |       |       |
| PRNP       | -.750 | -.372 | -.587 | .497  | -.434 | -.598  | -.426 | .586   | -.688 | -.635 | -.634  | .592   | .629  | .681  | -.382 | .560  | -.575 | -.466 | -.564      | -.565 | .565  | 1.000  | -.710 | .617  | .685  | 1.000 | -.452 | .473  | -.259 | -.334   | .341   | -.614 | .500    | .518  | -.662 |       |       |
| PYGO1      | .633  | .465  | .380  | -.392 | .350  | .380   | .312  | -.509  | .455  | .204  | .310   | -.449  | -.435 | -.277 | .646  | -.450 | .271  | .641  | .592       | .293  | 1.000 | -.402  | .575  | .562  | .383  | -.458 | -.514 | -.452 | 1.000 | -.566   | .447   | .346  | -.409   | .426  | -.611 | -.618 | .443  |
| STIL       | -.612 | -.376 | -.673 | .749  | -.374 | -.468  | -.509 | .579   | -.503 | -.418 | -.532  | .367   | .645  | .573  | -.474 | .603  | -.426 | -.497 | -.524      | -.348 | .425  | 1.000  | -.527 | .567  | .513  | .473  | -.566 | 1.000 | -.596 | -.596   | -.451  | .415  | -.591   | .764  | .838  | -.472 |       |
| SLC22A1    | .645  | .452  | .471  | -.596 | .509  | .268   | .516  | -.347  | .395  | .347  | .544   | -.352  | -.358 | -.379 | .517  | -.462 | .389  | .590  | .455       | .411  | 1.000 | -.463  | .644  | .511  | .421  | -.413 | -.259 | .447  | -.596 | 1.000   | .519   | -.475 | .372    | -.638 | -.592 | .516  |       |
| SLC9A1     | .614  | .458  | .548  | -.639 | .299  | .433   | .505  | -.344  | .409  | .321  | .295   | -.341  | -.408 | -.489 | .258  | -.465 | .235  | .408  | .444       | .466  | 1.000 | -.372  | .308  | .482  | -.478 | -.185 | -.334 | .346  | -.461 | .519    | 1.000  | -.585 | .474    | -.522 | -.410 | .532  |       |
| TOP2A      | -.612 | -.330 | -.442 | .498  | -.300 | -.313  | -.474 | .438   | -.444 | -.438 | -.309  | .233   | .288  | .279  | -.306 | .355  | -.327 | -.369 | -.285      | -.436 | .297  | 1.000  | -.432 | -.404 | -.383 | .466  | .209  | .341  | -.409 | .415    | -.475  | -.585 | 1.000   | -.538 | .503  | .406  | -.475 |
| TP53TG1    | .636  | .406  | .616  | -.702 | .347  | .485   | .467  | -.607  | .511  | .570  | .580   | -.467  | -.642 | -.684 | .373  | -.539 | .434  | .375  | .555       | .620  | 1.000 | -.414  | .277  | .273  | .712  | -.522 | -.461 | -.614 | .426  | -.591   | .372   | .474  | -.538   | 1.000 | -.638 | -.629 | .506  |
| TTK        | -.662 | -.459 | -.622 | .747  | -.356 | -.517  | -.480 | .529   | -.535 | -.352 | -.536  | .620   | .570  | .592  | -.521 | .586  | -.445 | -.559 | -.631      | -.487 | 1.000 | -.544  | -.545 | .628  | .646  | .509  | .500  | -.611 | .764  | -.638   | -.522  | .503  | -.638   | 1.000 | .757  | -.544 |       |
| USP1       | -.642 | -.507 | -.564 | .653  | -.352 | -.508  | -.534 | .627   | -.615 | -.494 | -.483  | .442   | .655  | .562  | -.580 | .625  | -.519 | -.628 | -.542      | -.455 | 1.000 | -.477  | -.538 | .669  | .613  | .594  | .518  | -.592 | -.410 | .406    | -.629  | .757  | 1.000   | -.463 | -.463 |       |       |
| PATZ1      | .709  | .274  | .557  | -.487 | .586  | .387   | .563  | -.507  | .518  | .461  | .474   | -.475  | -.512 | -.625 | -.352 | -.566 | .450  | .497  | .467       | 1.000 | -.595 | .627   | .456  | .631  | -.407 | -.662 | -.443 | -.472 | .516  | -.532   | -.475  | -.506 | -.544   | -.463 | 1.000 |       |       |
