# Supplementary material
Source: PubMed Central journal article supplement (PMC4302010)
Supplement: NIHMS635220-supplement-4.pdf [file NIHMS635220-supplement-4.pdf]

Supplementary File 4a. Immunohistochemistry results for AR and FVII staining in Tissue Microarray 1.

Normal tissues are highlighted in red and malignancies in black. Yellow background boxes indicate duplicate cores.

| Array Name | Position | Order | AR      | AR Status | Pathology                  | FVII    |
|------------|----------|-------|---------|-----------|----------------------------|---------|
| BRC1501B   | A01      | 1     | 0       | 0         | Normal/hyperplasia         | 0       |
| BRC1501B   | A02      | 2     | 0       | 0         | Normal/hyperplasia         | 0       |
| BRC1501B   | A03      | 3     | 35      | 1         | Normal/hyperplasia         | 2       |
| BRC1501B   | A04      | 4     | 30      | 1         | Fibroadenoma               | 1       |
| BRC1501B   | A05      | 5     | 0       | 0         | Fibroadenoma               | 0       |
| BRC1501B   | A06      | 6     | 0       | 0         | Ductal carcinoma in situ   | 1       |
| BRC1501B   | A07      | 7     | 0       | 0         | Invasive ductal carcinoma  | 0       |
| BRC1501B   | A08      | 8     | 0       | 0         | Invasive ductal carcinoma  | 2       |
| BRC1501B   | A09      | 9     | 24      | 1         | Invasive ductal carcinoma  | 1       |
| BRC1501B   | A10      | 10    | 10      | 1         | Invasive ductal carcinoma  | 2       |
| BRC1501B   | A11      | 11    | 0       | 0         | Invasive ductal carcinoma  | 1       |
| BRC1501B   | A12      | 12    | 0       | 0         | Invasive ductal carcinoma  | 2       |
| BRC1501B   | A13      | 13    | 0       | 0         | Invasive ductal carcinoma  | 0       |
| BRC1501B   | A14      | 14    | 0       | 1         | Invasive ductal carcinoma  | 2       |
| BRC1501B   | A15      | 15    | 0       | 0         | Invasive ductal carcinoma  | 2       |
| BRC1501B   | B01      | 16    | 0       | 0         | Normal/hyperplasia         | 1       |
| BRC1501B   | B02      | 17    | 0       | 0         | Normal/hyperplasia         | 1       |
| BRC1501B   | B03      | 18    | 0       | 1         | Normal/hyperplasia         | 0       |
| BRC1501B   | B04      | 19    | 25      | 1         | Fibroadenoma               | 1       |
| BRC1501B   | B05      | 20    | 0       | 0         | Fibroadenoma               | 0       |
| BRC1501B   | B06      | 21    | 5       | 0         | Ductal carcinoma in situ   | 2       |
| BRC1501B   | B07      | 22    | 0       | 0         | Invasive ductal carcinoma  | 0       |
| BRC1501B   | B08      | 23    | 0       | 0         | Invasive ductal carcinoma  | 2       |
| BRC1501B   | B09      | 24    | 38      | 1         | Invasive ductal carcinoma  | 2       |
| BRC1501B   | B10      | 25    | 86      | 1         | Invasive ductal carcinoma  | 2       |
| BRC1501B   | B11      | 26    | 0       | 0         | Invasive ductal carcinoma  | 1       |
| BRC1501B   | B12      | 27    | 0       | 0         | Invasive ductal carcinoma  | 2       |
| BRC1501B   | B13      | 28    | 0       | 0         | Invasive ductal carcinoma  | 0       |
| BRC1501B   | B14      | 29    | 68      | 1         | Invasive ductal carcinoma  | 2       |
| BRC1501B   | B15      | 30    | 0       | 0         | Invasive ductal carcinoma  | 2       |
| BRC1501B   | C01      | 31    | 67      | 1         | Invasive ductal carcinoma  | 3       |
| BRC1501B   | C02      | 32    | unknown | unknown   | Ductal carcinoma in situ   | 0       |
| BRC1501B   | C03      | 33    | 73      | 1         | Invasive ductal carcinoma  | 2       |
| BRC1501B   | C04      | 34    | 0       | 0         | Invasive ductal carcinoma  | 2       |
| BRC1501B   | C05      | 35    | 70      | 1         | Invasive ductal carcinoma  | 3       |
| BRC1501B   | C06      | 36    | 22      | 1         | Page's disease             | 3       |
| BRC1501B   | C07      | 37    | 62      | 1         | Ductal carcinoma in situ   | 1       |
| BRC1501B   | C08      | 38    | 51      | 1         | Invasive ductal carcinoma  | 2       |
| BRC1501B   | C09      | 39    | 0       | 0         | Invasive ductal carcinoma  | 2       |
| BRC1501B   | C10      | 40    | 76      | 1         | Invasive ductal carcinoma  | 3       |
| BRC1501B   | C11      | 41    | 0       | 0         | Invasive ductal carcinoma  | 2       |
| BRC1501B   | C12      | 42    | 66      | 1         | Ductal carcinoma in situ   | 3       |
| BRC1501B   | C13      | 43    | 0       | 0         | Invasive ductal carcinoma  | 2       |
| BRC1501B   | C14      | 44    | 6.5     | 0         | Invasive lobular carcinoma | 2       |
| BRC1501B   | C15      | 45    | 31      | 1         | Invasive ductal carcinoma  | 3       |
| BRC1501B   | D01      | 46    | 63      | 1         | Invasive ductal carcinoma  | 3       |
| BRC1501B   | D02      | 47    | unknown | unknown   | Ductal carcinoma in situ   | unknown |
| BRC1501B   | D03      | 48    | 73      | 1         | Invasive ductal carcinoma  | 2       |
| BRC1501B   | D04      | 49    | 0       | 0         | Invasive ductal carcinoma  | 2       |
| BRC1501B   | D05      | 50    | 71      | 1         | Invasive ductal carcinoma  | 3       |
| BRC1501B   | D06      | 51    | 47      | 1         | Page's disease             | 3       |
| BRC1501B   | D07      | 52    | 63      | 1         | Ductal carcinoma in situ   | 1       |
| BRC1501B   | D08      | 53    | 23      | 1         | Invasive ductal carcinoma  | 2       |
| BRC1501B   | D09      | 54    | 0       | 0         | Invasive ductal carcinoma  | 2       |
| BRC1501B   | D10      | 55    | 70      | 1         | Invasive ductal carcinoma  | 3       |
| BRC1501B   | D11      | 56    | 0       | 0         | Invasive ductal carcinoma  | 2       |
| BRC1501B   | D12      | 57    | 75      | 1         | Ductal carcinoma in situ   | 3       |
| BRC1501B   | D13      | 58    | 0       | 0         | Invasive ductal carcinoma  | 2       |
| BRC1501B   | D14      | 59    | 8       | 0         | Invasive lobular carcinoma | 2       |
| BRC1501B   | D15      | 60    | 0       | 1         | Invasive ductal carcinoma  | unknown |
| BRC1501B   | E01      | 61    | 69      | 1         | Invasive ductal carcinoma  | 3       |
| BRC1501B   | E02      | 62    | 34.5    | 1         | Invasive ductal carcinoma  | 0       |
| BRC1501B   | E03      | 63    | 0       | 0         | Invasive ductal carcinoma  | 2       |
| BRC1501B   | E04      | 64    | 95      | 1         | Invasive ductal carcinoma  | 3       |
| BRC1501B   | E05      | 65    | 5       | 0         | Invasive ductal carcinoma  | 2       |
| BRC1501B   | E06      | 66    | 63.5    | 1         | Invasive ductal carcinoma  | 3       |
| BRC1501B   | E07      | 67    | 67.5    | 1         | Invasive ductal carcinoma  | 1       |
| BRC1501B   | E08      | 68    | 67      | 1         | Invasive ductal carcinoma  | 3       |
| BRC1501B   | E09      | 69    | 0       | 0         | Invasive ductal carcinoma  | 1       |
| BRC1501B   | E10      | 70    | 78      | 1         | Invasive ductal carcinoma  | 3       |
| BRC1501B   | E11      | 71    | 0       | 0         | Micropapillary carcinoma   | 2       |
| BRC1501B   | E12      | 72    | 70      | 1         | Invasive ductal carcinoma  | 3       |
| BRC1501B   | E13      | 73    | 0       | 0         | Invasive ductal carcinoma  | 1       |
| BRC1501B   | E14      | 74    | 0       | 0         | Invasive ductal carcinoma  | 2       |
| BRC1501B   | E15      | 75    | 46      | 1         | Invasive ductal carcinoma  | 2       |
| BRC1501B   | F01      | 76    | 42      | 1         | Invasive ductal carcinoma  | 3       |
| BRC1501B   | F02      | 77    | 57      | 1         | Invasive ductal carcinoma  | 1       |
| BRC1501B   | F03      | 78    | 0       | 0         | Invasive ductal carcinoma  | 2       |
| BRC1501B   | F04      | 79    | 95      | 1         | Invasive ductal carcinoma  | 3       |
| BRC1501B   | F05      | 80    | 5       | 0         | Invasive ductal carcinoma  | 2       |
| BRC1501B   | F06      | 81    | 55      | 1         | Invasive ductal carcinoma  | 3       |
| BRC1501B   | F07      | 82    | 76      | 1         | Invasive ductal carcinoma  | 1       |
| BRC1501B   | F08      | 83    | 37      | 1         | Invasive ductal carcinoma  | 3       |
| BRC1501B   | F09      | 84    | 0       | 0         | Invasive ductal carcinoma  | 1       |
| BRC1501B   | F10      | 85    | 69      | 1         | Invasive ductal carcinoma  | 3       |
| BRC1501B   | F11      | 86    | 0       | 0         | Micropapillary carcinoma   | 2       |
| BRC1501B   | F12      | 87    | 72      | 1         | Invasive ductal carcinoma  | 3       |
| BRC1501B   | F13      | 88    | 0       | 0         | Invasive ductal carcinoma  | 1       |
| BRC1501B   | F14      | 89    | 5       | 0         | Invasive ductal carcinoma  | 2       |
| BRC1501B   | F15      | 90    | 0       | 1         | Invasive ductal carcinoma  | 2       |
| BRC1501B   | G01      | 91    | 0       | 0         | Invasive ductal carcinoma  | 2       |
| BRC1501B   | G02      | 92    | 95      | 1         | Invasive ductal carcinoma  | 3       |
| BRC1501B   | G03      | 93    | 90      | 1         | Invasive ductal carcinoma  | 2       |
| BRC1501B   | G04      | 94    | 90      | 1         | Invasive ductal carcinoma  | 2       |
| BRC1501B   | G05      | 95    | 62      | 1         | Invasive ductal carcinoma  | 2       |
| BRC1501B   | G06      | 96    | 26      | 1         | Invasive ductal carcinoma  | 2       |
| BRC1501B   | G07      | 97    | 90      | 1         | Invasive ductal carcinoma  | 3       |
| BRC1501B   | G08      | 98    | 54.5    | 1         | Invasive ductal carcinoma  | 3       |
| BRC1501B   | G09      | 99    | 48      | 1         | Invasive ductal carcinoma  | 2       |
| BRC1501B   | G10      | 100   | 80      | 1         | Invasive ductal carcinoma  | 2       |
| BRC1501B   | G11      | 101   | 0       | 0         | Invasive ductal carcinoma  | 2       |
| BRC1501B   | G12      | 102   | 64      | 1         | Invasive ductal carcinoma  | 2       |
| BRC1501B   | G13      | 103   | 80      | 1         | Invasive ductal carcinoma  | 2       |
| BRC1501B   | G14      | 104   | 90      | 1         | Invasive ductal carcinoma  | 2       |
| BRC1501B   | G15      | 105   | 90      | 1         | Invasive ductal carcinoma  | 2       |
| BRC1501B   | H01      | 106   | 0       | 0         | Invasive ductal carcinoma  | 2       |
| BRC1501B   | H02      | 107   | 95      | 1         | Invasive ductal carcinoma  | 2       |
| BRC1501B   | H03      | 108   | 90      | 1         | Invasive ductal carcinoma  | 2       |
| BRC1501B   | H04      | 109   | 80      | 1         | Invasive ductal carcinoma  | 2       |
| BRC1501B   | H05      | 110   | 60      | 1         | Invasive ductal carcinoma  | 2       |
| BRC1501B   | H06      | 111   | 50      | 1         | Invasive ductal carcinoma  | 2       |
| BRC1501B   | H07      | 112   | unknown | 1         | Invasive ductal carcinoma  | 2       |
| BRC1501B   | H08      | 113   | 80      | 1         | Invasive ductal carcinoma  | 2       |
| BRC1501B   | H09      | 114   | 57      | 1         | Invasive ductal carcinoma  | 2       |
| BRC1501B   | H10      | 115   | 90      | 1         | Invasive ductal carcinoma  | 2       |
| BRC1501B   | H11      | 116   | 0       | 0         | Invasive ductal carcinoma  | 2       |
| BRC1501B   | H12      | 117   | 46      | 1         | Invasive ductal carcinoma  | 2       |
| BRC1501B   | H13      | 118   | 80      | 1         | Invasive ductal carcinoma  | 2       |
| BRC1501B   | H14      | 119   | 80      | 1         | Invasive ductal carcinoma  | 2       |
| BRC1501B   | H15      | 120   | 90      | 1         | Invasive ductal carcinoma  | 2       |
| BRC1501B   | I01      | 121   | 0       | 0         | Invasive ductal carcinoma  | 3       |
| BRC1501B   | I02      | 122   | 67      | 1         | Invasive ductal carcinoma  | 2       |
| BRC1501B   | I03      | 123   | 90      | 1         | Invasive ductal carcinoma  | 2       |
| BRC1501B   | I04      | 124   | 61      | 1         | Invasive ductal carcinoma  | 3       |
| BRC1501B   | I05      | 125   | 90      | 1         | Invasive ductal carcinoma  | 2       |
| BRC1501B   | I06      | 126   | 56      | 1         | Invasive ductal carcinoma  | 2       |
| BRC1501B   | I07      | 127   | 0       | 0         | Invasive ductal carcinoma  | 1       |
| BRC1501B   | I08      | 128   | 53      | 1         | Invasive lobular carcinoma | 2       |
| BRC1501B   | I09      | 129   | 5       | 0         | Invasive ductal carcinoma  | 2       |
| BRC1501B   | I10      | 130   | 0       | 0         | Invasive ductal carcinoma  | 1       |
| BRC1501B   | I11      | 131   | 80      | 1         | Invasive ductal carcinoma  | 2       |
| BRC1501B   | I12      | 132   | 90      | 1         | Invasive ductal carcinoma  | 1       |
| BRC1501B   | I13      | 133   | 80      | 1         | Invasive ductal carcinoma  | 2       |
| BRC1501B   | I14      | 134   | 80      | 1         | Invasive ductal carcinoma  | 3       |
| BRC1501B   | I15      | 135   | 0       | 0         | Invasive ductal carcinoma  | 0       |
| BRC1501B   | J01      | 136   | 0       | 0         | Invasive ductal carcinoma  | 3       |
| BRC1501B   | J02      | 137   | 80      | 1         | Invasive ductal carcinoma  | 2       |
| BRC1501B   | J03      | 138   | 90      | 1         | Invasive ductal carcinoma  | 2       |
| BRC1501B   | J04      | 139   | 66      | 1         | Invasive ductal carcinoma  | 2       |
| BRC1501B   | J05      | 140   | 90      | 1         | Invasive ductal carcinoma  | 1       |
| BRC1501B   | J06      | 141   | 41      | 1         | Invasive ductal carcinoma  | 2       |
| BRC1501B   | J07      | 142   | 0       | 0         | Invasive ductal carcinoma  | 1       |
| BRC1501B   | J08      | 143   | 30      | 1         | Invasive lobular carcinoma | 2       |
| BRC1501B   | J09      | 144   | 5       | 0         | Invasive ductal carcinoma  | 2       |
| BRC1501B   | J10      | 145   | 0       | 0         | Invasive ductal carcinoma  | 1       |
| BRC1501B   | J11      | 146   | 60      | 1         | Invasive ductal carcinoma  | 2       |
| BRC1501B   | J12      | 147   | 90      | 1         | Invasive ductal carcinoma  | 2       |
| BRC1501B   | J13      | 148   | 80      | 1         | Invasive ductal carcinoma  | 1       |
| BRC1501B   | J14      | 149   | 80      | 1         | Invasive ductal carcinoma  | 3       |
| BRC1501B   | J15      | 150   | 0       | 0         | Invasive ductal carcinoma  | 0       |

## Supplementary File 4b. Immunohistochemistry results for AR and FVII staining in Tissue Microarray 2.

Normal tissues are highlighted in red and malignancies in black. Yellow background boxes indicate duplicate cores.

| Array Name | Position | Order | AR      | AR Status | Pathology                         | FVII |
|------------|----------|-------|---------|-----------|-----------------------------------|------|
| BRC1502D   | A01      | 1     | 15      | 1         | Normal/hyperplasia                | 1    |
| BRC1502D   | A02      | 2     | 0       | 1         | Normal/hyperplasia                | 0    |
| BRC1502D   | A03      | 3     | 31      | 1         | Normal/hyperplasia                | 1    |
| BRC1502D   | A04      | 4     | 60      | 1         | Fibroadenoma                      | 0    |
| BRC1502D   | A05      | 5     | 30      | 1         | Fibroadenoma                      | 0    |
| BRC1502D   | A06      | 6     | 5       | 0         | Invasive ductal carcinoma         | 1    |
| BRC1502D   | A07      | 7     | 50      | 1         | Invasive ductal carcinoma         | 2    |
| BRC1502D   | A08      | 8     | 41      | 1         | Ductal carcinoma in situ          | 1    |
| BRC1502D   | A09      | 9     | 90      | 1         | Ductal carcinoma in situ          | 1    |
| BRC1502D   | A10      | 10    | 80      | 1         | Invasive ductal carcinoma         | 2    |
| BRC1502D   | A11      | 11    | 5       | 0         | Invasive ductal carcinoma         | 1    |
| BRC1502D   | A12      | 12    | unknown | 1         | Invasive ductal carcinoma         | 2    |
| BRC1502D   | A13      | 13    | 0       | 0         | Invasive ductal carcinoma         | 2    |
| BRC1502D   | A14      | 14    | 90      | 1         | Invasive tubulo-lobular carcinoma | 3    |
| BRC1502D   | A15      | 15    | 37      | 1         | Invasive ductal carcinoma         | 1    |
| BRC1502D   | B01      | 16    | 25      | 1         | Normal/hyperplasia                | 1    |
| BRC1502D   | B02      | 17    | 37      | 1         | Normal/hyperplasia                | 0    |
| BRC1502D   | B03      | 18    | 30      | 1         | Normal/hyperplasia                | 1    |
| BRC1502D   | B04      | 19    | 60      | 1         | Fibroadenoma                      | 0    |
| BRC1502D   | B05      | 20    | 30      | 1         | Fibroadenoma                      | 0    |
| BRC1502D   | B06      | 21    | 0       | 0         | Invasive ductal carcinoma         | 1    |
| BRC1502D   | B07      | 22    | 80      | 1         | Invasive ductal carcinoma         | 2    |
| BRC1502D   | B08      | 23    | 57      | 1         | Ductal carcinoma in situ          | 2    |
| BRC1502D   | B09      | 24    | 90      | 1         | Ductal carcinoma in situ          | 1    |
| BRC1502D   | B10      | 25    | 80      | 1         | Invasive ductal carcinoma         | 2    |
| BRC1502D   | B11      | 26    | 5       | 0         | Invasive ductal carcinoma         | 1    |
| BRC1502D   | B12      | 27    | 66      | 1         | Invasive ductal carcinoma         | 2    |
| BRC1502D   | B13      | 28    | 0       | 0         | Invasive ductal carcinoma         | 2    |
| BRC1502D   | B14      | 29    | 90      | 1         | Invasive tubulo-lobular carcinoma | 3    |
| BRC1502D   | B15      | 30    | 54      | 1         | Invasive ductal carcinoma         | 1    |
| BRC1502D   | C01      | 31    | 95      | 1         | Invasive ductal carcinoma         | 1    |
| BRC1502D   | C02      | 32    | 5       | 0         | Invasive ductal carcinoma         | 1    |
| BRC1502D   | C03      | 33    | 0       | 0         | Invasive ductal carcinoma         | 1    |
| BRC1502D   | C04      | 34    | 9       | 0         | Invasive ductal carcinoma         | 1    |
| BRC1502D   | C05      | 35    | 45      | 1         | Invasive ductal carcinoma         | 2    |
| BRC1502D   | C06      | 36    | 60      | 1         | Invasive ductal carcinoma         | 2    |
| BRC1502D   | C07      | 37    | 0       | 0         | Invasive ductal carcinoma         | 1    |
| BRC1502D   | C08      | 38    | 80      | 1         | Invasive ductal carcinoma         | 1    |
| BRC1502D   | C09      | 39    | 80      | 1         | Invasive papillary carcinoma      | 2    |
| BRC1502D   | C10      | 40    | 26      | 1         | Invasive ductal carcinoma         | 3    |
| BRC1502D   | C11      | 41    | 5       | 0         | Invasive ductal carcinoma         | 1    |
| BRC1502D   | C12      | 42    | 17      | 1         | Sarcoma                           | 1    |
| BRC1502D   | C13      | 43    | 30      | 1         | Ductal carcinoma in situ          | 2    |
| BRC1502D   | C14      | 44    | 50      | 1         | Invasive ductal carcinoma         | 1    |
| BRC1502D   | C15      | 45    | 80      | 1         | Ductal carcinoma in situ          | 2    |
| BRC1502D   | D01      | 46    | 95      | 1         | Invasive ductal carcinoma         | 1    |
| BRC1502D   | D02      | 47    | 5       | 0         | Invasive ductal carcinoma         | 2    |
| BRC1502D   | D03      | 48    | 0       | 0         | Invasive ductal carcinoma         | 1    |
| BRC1502D   | D04      | 49    | 8       | 0         | Invasive ductal carcinoma         | 1    |
| BRC1502D   | D05      | 50    | 50      | 1         | Invasive ductal carcinoma         | 1    |
| BRC1502D   | D06      | 51    | 70      | 1         | Invasive ductal carcinoma         | 1    |
| BRC1502D   | D07      | 52    | 0       | 0         | Invasive ductal carcinoma         | 1    |
| BRC1502D   | D08      | 53    | 60      | 1         | Invasive ductal carcinoma         | 1    |
| BRC1502D   | D09      | 54    | 50      | 1         | Invasive papillary carcinoma      | 2    |
| BRC1502D   | D10      | 55    | 30      | 1         | Invasive ductal carcinoma         | 3    |
| BRC1502D   | D11      | 56    | 0       | 0         | Invasive ductal carcinoma         | 1    |
| BRC1502D   | D12      | 57    | 20      | 1         | Sarcoma                           | 1    |
| BRC1502D   | D13      | 58    | 30      | 1         | Ductal carcinoma in situ          | 1    |
| BRC1502D   | D14      | 59    | 60      | 1         | Invasive ductal carcinoma         | 1    |
| BRC1502D   | D15      | 60    | 80      | 1         | Ductal carcinoma in situ          | 2    |
| BRC1502D   | E01      | 61    | 90      | 1         | Invasive ductal carcinoma         | 1    |
| BRC1502D   | E02      | 62    | 0       | 0         | Invasive ductal carcinoma         | 1    |
| BRC1502D   | E03      | 63    | 67      | 1         | Invasive ductal carcinoma         | 2    |
| BRC1502D   | E04      | 64    | 50      | 1         | Invasive ductal carcinoma         | 1    |
| BRC1502D   | E05      | 65    | 11      | 1         | Invasive ductal carcinoma         | 1    |
| BRC1502D   | E06      | 66    | 54      | 1         | Invasive ductal carcinoma         | 2    |
| BRC1502D   | E07      | 67    | 100     | 1         | Ductal carcinoma in situ          | 2    |
| BRC1502D   | E08      | 68    | 90      | 1         | Invasive ductal carcinoma         | 2    |
| BRC1502D   | E09      | 69    | 80      | 1         | Invasive ductal carcinoma         | 2    |
| BRC1502D   | E10      | 70    | 80      | 1         | Invasive ductal carcinoma         | 2    |
| BRC1502D   | E11      | 71    | 100     | 1         | Invasive ductal carcinoma         | 2    |
| BRC1502D   | E12      | 72    | 80      | 1         | Invasive ductal carcinoma         | 2    |
| BRC1502D   | E13      | 73    | 2       | 1         | Invasive ductal carcinoma         | 2    |
| BRC1502D   | E14      | 74    | 56      | 1         | Invasive papillary carcinoma      | 2    |
| BRC1502D   | E15      | 75    | 10      | 1         | Invasive ductal carcinoma         | 2    |
| BRC1502D   | F01      | 76    | 90      | 1         | Invasive ductal carcinoma         | 1    |
| BRC1502D   | F02      | 77    | 2       | 0         | Invasive ductal carcinoma         | 1    |
| BRC1502D   | F03      | 78    | 63      | 1         | Invasive ductal carcinoma         | 2    |
| BRC1502D   | F04      | 79    | 50      | 1         | Invasive ductal carcinoma         | 1    |
| BRC1502D   | F05      | 80    | 26      | 1         | Invasive ductal carcinoma         | 1    |
| BRC1502D   | F06      | 81    | 80      | 1         | Invasive ductal carcinoma         | 2    |
| BRC1502D   | F07      | 82    | 100     | 1         | Ductal carcinoma in situ          | 1    |
| BRC1502D   | F08      | 83    | 90      | 1         | Invasive ductal carcinoma         | 2    |
| BRC1502D   | F09      | 84    | 90      | 1         | Invasive ductal carcinoma         | 2    |
| BRC1502D   | F10      | 85    | 90      | 1         | Invasive ductal carcinoma         | 2    |
| BRC1502D   | F11      | 86    | 100     | 1         | Invasive ductal carcinoma         | 3    |
| BRC1502D   | F12      | 87    | 90      | 1         | Invasive ductal carcinoma         | 2    |
| BRC1502D   | F13      | 88    | 5       | 1         | Invasive ductal carcinoma         | 2    |
| BRC1502D   | F14      | 89    | 60      | 1         | Invasive papillary carcinoma      | 2    |
| BRC1502D   | F15      | 90    | 22      | 1         | Invasive ductal carcinoma         | 1    |
| BRC1502D   | G01      | 91    | 90      | 1         | Invasive ductal carcinoma         | 2    |
| BRC1502D   | G02      | 92    | 0       | 0         | Invasive ductal carcinoma         | 3    |
| BRC1502D   | G03      | 93    | 90      | 1         | Invasive ductal carcinoma         | 3    |
| BRC1502D   | G04      | 94    | 80      | 1         | Invasive ductal carcinoma         | 2    |
| BRC1502D   | G05      | 95    | 90      | 1         | Invasive ductal carcinoma         | 2    |
| BRC1502D   | G06      | 96    | 2       | 0         | Invasive ductal carcinoma         | 1    |
| BRC1502D   | G07      | 97    | 40      | 1         | Invasive ductal carcinoma         | 1    |
| BRC1502D   | G08      | 98    | 90      | 1         | Invasive ductal carcinoma         | 1    |
| BRC1502D   | G09      | 99    | 80      | 1         | Invasive ductal carcinoma         | 2    |
| BRC1502D   | G10      | 100   | 70      | 1         | Invasive ductal carcinoma         | 2    |
| BRC1502D   | G11      | 101   | 5       | 1         | Invasive ductal carcinoma         | 1    |
| BRC1502D   | G12      | 102   | 60      | 1         | Ductal carcinoma in situ          | 2    |
| BRC1502D   | G13      | 103   | 80      | 1         | Invasive ductal carcinoma         | 2    |
| BRC1502D   | G14      | 104   | 0       | 0         | Invasive papillary carcinoma      | 2    |
| BRC1502D   | G15      | 105   | 90      | 1         | Invasive ductal carcinoma         | 2    |
| BRC1502D   | H01      | 106   | 90      | 1         | Invasive ductal carcinoma         | 2    |
| BRC1502D   | H02      | 107   | 2       | 0         | Invasive ductal carcinoma         | 3    |
| BRC1502D   | H03      | 108   | 90      | 1         | Invasive ductal carcinoma         | 3    |
| BRC1502D   | H04      | 109   | 80      | 1         | Invasive ductal carcinoma         | 2    |
| BRC1502D   | H05      | 110   | 90      | 1         | Invasive ductal carcinoma         | 2    |
| BRC1502D   | H06      | 111   | 2       | 0         | Invasive ductal carcinoma         | 2    |
| BRC1502D   | H07      | 112   | 80      | 1         | Invasive ductal carcinoma         | 2    |
| BRC1502D   | H08      | 113   | 90      | 1         | Invasive ductal carcinoma         | 1    |
| BRC1502D   | H09      | 114   | 90      | 1         | Invasive ductal carcinoma         | 2    |
| BRC1502D   | H10      | 115   | 70      | 1         | Invasive ductal carcinoma         | 1    |
| BRC1502D   | H11      | 116   | 48      | 1         | Invasive ductal carcinoma         | 1    |
| BRC1502D   | H12      | 117   | 30      | 1         | Ductal carcinoma in situ          | 2    |
| BRC1502D   | H13      | 118   | 80      | 1         | Invasive ductal carcinoma         | 2    |
| BRC1502D   | H14      | 119   | 0       | 0         | Invasive papillary carcinoma      | 2    |
| BRC1502D   | H15      | 120   | 90      | 1         | Invasive ductal carcinoma         | 2    |
| BRC1502D   | I01      | 121   | 80      | 1         | Invasive ductal carcinoma         | 2    |
| BRC1502D   | I02      | 122   | 80      | 1         | Invasive ductal carcinoma         | 2    |
| BRC1502D   | I03      | 123   | 60      | 1         | Invasive ductal carcinoma         | 2    |
| BRC1502D   | I04      | 124   | 50      | 1         | Invasive ductal carcinoma         | 2    |
| BRC1502D   | I05      | 125   | 80      | 1         | Invasive ductal carcinoma         | 2    |
| BRC1502D   | I06      | 126   | 80      | 1         | Invasive ductal carcinoma         | 2    |
| BRC1502D   | I07      | 127   | 80      | 1         | Invasive ductal carcinoma         | 1    |
| BRC1502D   | I08      | 128   | 20      | 1         | Invasive ductal carcinoma         | 2    |
| BRC1502D   | I09      | 129   | 50      | 1         | Invasive ductal carcinoma         | 2    |
| BRC1502D   | I10      | 130   | 0       | 0         | Invasive ductal carcinoma         | 1    |
| BRC1502D   | I11      | 131   | 23      | 1         | Invasive ductal carcinoma         | 3    |
| BRC1502D   | I12      | 132   | 80      | 1         | Invasive ductal carcinoma         | 3    |
| BRC1502D   | I13      | 133   | 80      | 1         | Invasive lobular carcinoma        | 3    |
| BRC1502D   | I14      | 134   | 70      | 1         | Invasive ductal carcinoma         | 2    |
| BRC1502D   | I15      | 135   | 60      | 1         | Invasive ductal carcinoma         | 2    |
| BRC1502D   | J01      | 136   | 80      | 1         | Invasive ductal carcinoma         | 2    |
| BRC1502D   | J02      | 137   | 80      | 1         | Invasive ductal carcinoma         | 2    |
| BRC1502D   | J03      | 138   | 20      | 1         | Invasive ductal carcinoma         | 2    |
| BRC1502D   | J04      | 139   | 20      | 1         | Invasive ductal carcinoma         | 2    |
| BRC1502D   | J05      | 140   | 80      | 1         | Invasive ductal carcinoma         | 2    |
| BRC1502D   | J06      | 141   | 80      | 1         | Invasive ductal carcinoma         | 2    |
| BRC1502D   | J07      | 142   | 80      | 1         | Invasive ductal carcinoma         | 1    |
| BRC1502D   | J08      | 143   | 70      | 1         | Invasive ductal carcinoma         | 1    |
| BRC1502D   | J09      | 144   | 50      | 1         | Invasive ductal carcinoma         | 1    |
| BRC1502D   | J10      | 145   | 0       | 0         | Invasive ductal carcinoma         | 2    |
| BRC1502D   | J11      | 146   | 25      | 1         | Invasive ductal carcinoma         | 3    |
| BRC1502D   | J12      | 147   | 80      | 1         | Invasive ductal carcinoma         | 3    |
| BRC1502D   | J13      | 148   | 80      | 1         | Invasive lobular carcinoma        | 3    |
| BRC1502D   | J14      | 149   | 30      | 1         | Invasive ductal carcinoma         | 2    |
| BRC1502D   | J15      | 150   | 60      | 1         | Invasive ductal carcinoma         | 2    |

Supplementary File 4c. Immunohistochemistry results for AR and FVII staining in Tissue Microarray 3.

Normal tissues are highlighted in red and malignancies in black. Yellow background boxes indicate duplicate cores.

| Array Name | Position | Order | AR      | AR Status | Pathology                    | FVII |
|------------|----------|-------|---------|-----------|------------------------------|------|
| BRC1503B   | A01      | 1     | 5       | 0         | Normal                       | 2    |
| BRC1503B   | A02      | 2     | 0       | 1         | Adenosis                     | 2    |
| BRC1503B   | A03      | 3     | 0       | 0         | Adenosis                     | 0    |
| BRC1503B   | A04      | 4     | 100     | 1         | Fibroadenoma                 | 1    |
| BRC1503B   | A05      | 5     | 50      | 1         | Fibrocystic disease          | 2    |
| BRC1503B   | A06      | 6     | 49      | 1         | Invasive ductal carcinoma    | 2    |
| BRC1503B   | A07      | 7     | 80      | 1         | Invasive ductal carcinoma    | 2    |
| BRC1503B   | A08      | 8     | 70      | 1         | Invasive ductal carcinoma    | 1    |
| BRC1503B   | A09      | 9     | 40      | 1         | Invasive ductal carcinoma    | 2    |
| BRC1503B   | A10      | 10    | 90      | 1         | Invasive ductal carcinoma    | 1    |
| BRC1503B   | A11      | 11    | 90      | 1         | Invasive ductal carcinoma    | 1    |
| BRC1503B   | A12      | 12    | 70      | 1         | Invasive ductal carcinoma    | 2    |
| BRC1503B   | A13      | 13    | 60      | 1         | Invasive lobular carcinoma   | 2    |
| BRC1503B   | A14      | 14    | 0       | 0         | Invasive ductal carcinoma    | 2    |
| BRC1503B   | A15      | 15    | 0       | 0         | Invasive lobular carcinoma   | 2    |
| BRC1503B   | B01      | 16    | 10      | 0         | Normal                       | 2    |
| BRC1503B   | B02      | 17    | 20      | 1         | Adenosis                     | 2    |
| BRC1503B   | B03      | 18    | 0       | 0         | Adenosis                     | 0    |
| BRC1503B   | B04      | 19    | 100     | 1         | Fibroadenoma                 | 1    |
| BRC1503B   | B05      | 20    | 50      | 1         | Fibrocystic disease          | 2    |
| BRC1503B   | B06      | 21    | 0       | 1         | Invasive ductal carcinoma    | 2    |
| BRC1503B   | B07      | 22    | 80      | 1         | Invasive ductal carcinoma    | 2    |
| BRC1503B   | B08      | 23    | 80      | 1         | Invasive ductal carcinoma    | 1    |
| BRC1503B   | B09      | 24    | 50      | 1         | Invasive ductal carcinoma    | 2    |
| BRC1503B   | B10      | 25    | 90      | 1         | Invasive ductal carcinoma    | 1    |
| BRC1503B   | B11      | 26    | 90      | 1         | Invasive ductal carcinoma    | 2    |
| BRC1503B   | B12      | 27    | 80      | 1         | Invasive ductal carcinoma    | 2    |
| BRC1503B   | B13      | 28    | 60      | 1         | Invasive lobular carcinoma   | 2    |
| BRC1503B   | B14      | 29    | 0       | 0         | Invasive ductal carcinoma    | 2    |
| BRC1503B   | B15      | 30    | 5       | 0         | Invasive lobular carcinoma   | 2    |
| BRC1503B   | C01      | 31    | 70      | 1         | Invasive ductal carcinoma    | 1    |
| BRC1503B   | C02      | 32    | 70      | 1         | Lobular carcinoma in situ    | 2    |
| BRC1503B   | C03      | 33    | 60      | 1         | Invasive lobular carcinoma   | 2    |
| BRC1503B   | C04      | 34    | 50      | 1         | Invasive ductal carcinoma    | 2    |
| BRC1503B   | C05      | 35    | 20      | 1         | Invasive ductal carcinoma    | 2    |
| BRC1503B   | C06      | 36    | 80      | 1         | Invasive ductal carcinoma    | 2    |
| BRC1503B   | C07      | 37    | 14      | 1         | Invasive ductal carcinoma    | 2    |
| BRC1503B   | C08      | 38    | 60      | 1         | Invasive ductal carcinoma    | 2    |
| BRC1503B   | C09      | 39    | 50      | 1         | Invasive ductal carcinoma    | 2    |
| BRC1503B   | C10      | 40    | 50      | 1         | Invasive ductal carcinoma    | 2    |
| BRC1503B   | C11      | 41    | 0       | 0         | Invasive ductal carcinoma    | 2    |
| BRC1503B   | C12      | 42    | 0       | 0         | Invasive ductal carcinoma    | 2    |
| BRC1503B   | C13      | 43    | 0       | 0         | Invasive ductal carcinoma    | 1    |
| BRC1503B   | C14      | 44    | 60      | 1         | Invasive ductal carcinoma    | 2    |
| BRC1503B   | C15      | 45    | 50      | 1         | Invasive ductal carcinoma    | 2    |
| BRC1503B   | D01      | 46    | 60      | 1         | Invasive ductal carcinoma    | 2    |
| BRC1503B   | D02      | 47    | 70      | 1         | Lobular carcinoma in situ    | 2    |
| BRC1503B   | D03      | 48    | 60      | 1         | Invasive lobular carcinoma   | 3    |
| BRC1503B   | D04      | 49    | 50      | 1         | Invasive ductal carcinoma    | 2    |
| BRC1503B   | D05      | 50    | 50      | 1         | Invasive ductal carcinoma    | 2    |
| BRC1503B   | D06      | 51    | 80      | 1         | Invasive ductal carcinoma    | 2    |
| BRC1503B   | D07      | 52    | 20      | 1         | Invasive ductal carcinoma    | 1    |
| BRC1503B   | D08      | 53    | 60      | 1         | Invasive ductal carcinoma    | 2    |
| BRC1503B   | D09      | 54    | 70      | 1         | Invasive ductal carcinoma    | 2    |
| BRC1503B   | D10      | 55    | 20      | 1         | Invasive ductal carcinoma    | 2    |
| BRC1503B   | D11      | 56    | 10      | 0         | Invasive ductal carcinoma    | 2    |
| BRC1503B   | D12      | 57    | 0       | 0         | Invasive ductal carcinoma    | 2    |
| BRC1503B   | D13      | 58    | 0       | 0         | Invasive ductal carcinoma    | 1    |
| BRC1503B   | D14      | 59    | 60      | 1         | Invasive ductal carcinoma    | 2    |
| BRC1503B   | D15      | 60    | 30      | 1         | Invasive ductal carcinoma    | 2    |
| BRC1503B   | E01      | 61    | 5       | 0         | Invasive ductal carcinoma    | 3    |
| BRC1503B   | E02      | 62    | 0       | 0         | Invasive ductal carcinoma    | 2    |
| BRC1503B   | E03      | 63    | 40      | 1         | Invasive ductal carcinoma    | 3    |
| BRC1503B   | E04      | 64    | 80      | 1         | Invasive ductal carcinoma    | 3    |
| BRC1503B   | E05      | 65    | 0       | 0         | Invasive ductal carcinoma    | 2    |
| BRC1503B   | E06      | 66    | 80      | 1         | Invasive ductal carcinoma    | 3    |
| BRC1503B   | E07      | 67    | 20      | 1         | Invasive ductal carcinoma    | 2    |
| BRC1503B   | E08      | 68    | 60      | 1         | Invasive ductal carcinoma    | 3    |
| BRC1503B   | E09      | 69    | 0       | 0         | Lobular carcinoma in situ    | 2    |
| BRC1503B   | E10      | 70    | 90      | 1         | Invasive carcinoma, apocrine | 2    |
| BRC1503B   | E11      | 71    | 0       | 0         | Invasive ductal carcinoma    | 2    |
| BRC1503B   | E12      | 72    | 60      | 1         | Invasive ductal carcinoma    | 3    |
| BRC1503B   | E13      | 73    | 30      | 1         | Invasive lobular carcinoma   | 2    |
| BRC1503B   | E14      | 74    | 80      | 1         | Invasive tubular carcinoma   | 2    |
| BRC1503B   | E15      | 75    | 0       | 0         | Invasive ductal carcinoma    | 3    |
| BRC1503B   | F01      | 76    | 5       | 0         | Invasive ductal carcinoma    | 3    |
| BRC1503B   | F02      | 77    | 0       | 0         | Invasive ductal carcinoma    | 2    |
| BRC1503B   | F03      | 78    | 50      | 1         | Invasive ductal carcinoma    | 2    |
| BRC1503B   | F04      | 79    | 90      | 1         | Invasive ductal carcinoma    | 2    |
| BRC1503B   | F05      | 80    | 0       | 0         | Invasive ductal carcinoma    | 2    |
| BRC1503B   | F06      | 81    | 80      | 1         | Invasive ductal carcinoma    | 3    |
| BRC1503B   | F07      | 82    | 50      | 1         | Invasive ductal carcinoma    | 2    |
| BRC1503B   | F08      | 83    | 80      | 1         | Invasive ductal carcinoma    | 2    |
| BRC1503B   | F09      | 84    | 0       | 0         | Lobular carcinoma in situ    | 1    |
| BRC1503B   | F10      | 85    | 90      | 1         | Invasive carcinoma, apocrine | 2    |
| BRC1503B   | F11      | 86    | 5       | 0         | Invasive ductal carcinoma    | 2    |
| BRC1503B   | F12      | 87    | 60      | 1         | Invasive ductal carcinoma    | 3    |
| BRC1503B   | F13      | 88    | 30      | 1         | Invasive lobular carcinoma   | 3    |
| BRC1503B   | F14      | 89    | 80      | 1         | Invasive tubular carcinoma   | 2    |
| BRC1503B   | F15      | 90    | 0       | 0         | Invasive ductal carcinoma    | 3    |
| BRC1503B   | G01      | 91    | 50      | 1         | Invasive ductal carcinoma    | 2    |
| BRC1503B   | G02      | 92    | 30      | 1         | Invasive ductal carcinoma    | 3    |
| BRC1503B   | G03      | 93    | 40      | 1         | Invasive ductal carcinoma    | 1    |
| BRC1503B   | G04      | 94    | 80      | 1         | Invasive ductal carcinoma    | 2    |
| BRC1503B   | G05      | 95    | 20      | 1         | Invasive ductal carcinoma    | 2    |
| BRC1503B   | G06      | 96    | 0       | 0         | Invasive ductal carcinoma    | 2    |
| BRC1503B   | G07      | 97    | unknown | 1         | Invasive ductal carcinoma    | 2    |
| BRC1503B   | G08      | 98    | 50      | 1         | Invasive ductal carcinoma    | 2    |
| BRC1503B   | G09      | 99    | 80      | 1         | Invasive ductal carcinoma    | 2    |
| BRC1503B   | G10      | 100   | 80      | 1         | Invasive ductal carcinoma    | 3    |
| BRC1503B   | G11      | 101   | 80      | 1         | Intra-ductal carcinoma       | 2    |
| BRC1503B   | G12      | 102   | 80      | 1         | Invasive ductal carcinoma    | 3    |
| BRC1503B   | G13      | 103   | 0       | 1         | Invasive ductal carcinoma    | 3    |
| BRC1503B   | G14      | 104   | 0       | 0         | Invasive ductal carcinoma    | 2    |
| BRC1503B   | G15      | 105   | 60      | 1         | Invasive ductal carcinoma    | 3    |
| BRC1503B   | H01      | 106   | 50      | 1         | Invasive ductal carcinoma    | 2    |
| BRC1503B   | H02      | 107   | 5       | 1         | Invasive ductal carcinoma    | 2    |
| BRC1503B   | H03      | 108   | 40      | 1         | Invasive ductal carcinoma    | 2    |
| BRC1503B   | H04      | 109   | 80      | 1         | Invasive ductal carcinoma    | 2    |
| BRC1503B   | H05      | 110   | 40      | 1         | Invasive ductal carcinoma    | 2    |
| BRC1503B   | H06      | 111   | 0       | 0         | Invasive ductal carcinoma    | 1    |
| BRC1503B   | H07      | 112   | 70      | 1         | Invasive ductal carcinoma    | 2    |
| BRC1503B   | H08      | 113   | 50      | 1         | Invasive ductal carcinoma    | 2    |
| BRC1503B   | H09      | 114   | 80      | 1         | Invasive ductal carcinoma    | 3    |
| BRC1503B   | H10      | 115   | 60      | 1         | Invasive ductal carcinoma    | 3    |
| BRC1503B   | H11      | 116   | 80      | 1         | Intra-ductal carcinoma       | 2    |
| BRC1503B   | H12      | 117   | 80      | 1         | Invasive ductal carcinoma    | 3    |
| BRC1503B   | H13      | 118   | 30      | 1         | Invasive ductal carcinoma    | 3    |
| BRC1503B   | H14      | 119   | 0       | 0         | Invasive ductal carcinoma    | 3    |
| BRC1503B   | H15      | 120   | 60      | 1         | Invasive ductal carcinoma    | 2    |
| BRC1503B   | I01      | 121   | 40      | 1         | Invasive ductal carcinoma    | 2    |
| BRC1503B   | I02      | 122   | 80      | 1         | Invasive ductal carcinoma    | 3    |
| BRC1503B   | I03      | 123   | 50      | 1         | Invasive ductal carcinoma    | 3    |
| BRC1503B   | I04      | 124   | 80      | 1         | Invasive ductal carcinoma    | 2    |
| BRC1503B   | I05      | 125   | 0       | 0         | Invasive ductal carcinoma    | 2    |
| BRC1503B   | I06      | 126   | 40      | 1         | Invasive ductal carcinoma    | 2    |
| BRC1503B   | I07      | 127   | 70      | 1         | Invasive ductal carcinoma    | 2    |
| BRC1503B   | I08      | 128   | 60      | 1         | Invasive ductal carcinoma    | 2    |
| BRC1503B   | I09      | 129   | unknown | 1         | Invasive ductal carcinoma    | 2    |
| BRC1503B   | I10      | 130   | 70      | 1         | Invasive ductal carcinoma    | 2    |
| BRC1503B   | I11      | 131   | 40      | 1         | Invasive ductal carcinoma    | 2    |
| BRC1503B   | I12      | 132   | 50      | 1         | Invasive lobular carcinoma   | 2    |
| BRC1503B   | I13      | 133   | 90      | 1         | Invasive ductal carcinoma    | 3    |
| BRC1503B   | I14      | 134   | 70      | 1         | Tubular mixed carcinoma      | 2    |
| BRC1503B   | I15      | 135   | 0       | 0         | Intra-ductal carcinoma       | 0    |
| BRC1503B   | J01      | 136   | 40      | 1         | Invasive ductal carcinoma    | 3    |
| BRC1503B   | J02      | 137   | 80      | 1         | Invasive ductal carcinoma    | 2    |
| BRC1503B   | J03      | 138   | 50      | 1         | Invasive ductal carcinoma    | 3    |
| BRC1503B   | J04      | 139   | 80      | 1         | Invasive ductal carcinoma    | 2    |
| BRC1503B   | J05      | 140   | 0       | 0         | Invasive ductal carcinoma    | 2    |
| BRC1503B   | J06      | 141   | 50      | 1         | Invasive ductal carcinoma    | 3    |
| BRC1503B   | J07      | 142   | 70      | 1         | Invasive ductal carcinoma    | 2    |
| BRC1503B   | J08      | 143   | 60      | 1         | Invasive ductal carcinoma    | 3    |
| BRC1503B   | J09      | 144   | 80      | 1         | Invasive ductal carcinoma    | 2    |
| BRC1503B   | J10      | 145   | 40      | 1         | Invasive ductal carcinoma    | 2    |
| BRC1503B   | J11      | 146   | 50      | 1         | Invasive ductal carcinoma    | 3    |
| BRC1503B   | J12      | 147   | 50      | 1         | Invasive lobular carcinoma   | 2    |
| BRC1503B   | J13      | 148   | 90      | 1         | Invasive ductal carcinoma    | 3    |
| BRC1503B   | J14      | 149   | 70      | 1         | Tubular mixed carcinoma      | 2    |
| BRC1503B   | J15      | 150   | 0       | 0         | Intra-ductal carcinoma       | 0    |
